# Supplementary material for: Microbial electrochemical treatment of biorefinery black liquor and resource recovery
Source: Royal Society of Chemistry journal article supplement (doi:10.1039/c8gc02909a), 2018-12-06
Supplement: c8gc02909a1.pdf [file c8gc02909a1.pdf]

## Supplementary Information

### **Microbial electrochemical treatment of biorefinery black liquor and resource recovery**

Xi Chen<sup>a,b</sup>, Katahira Rui<sup>c</sup>, Zheng Ge<sup>b</sup>, Lu Lu<sup>a,b</sup>, Dianxun Hou<sup>b</sup>, Darren Peterson<sup>c</sup>,  
Melvin Tucker<sup>c</sup>, Xiaowen Chen<sup>c\*</sup>, Zhiyong Jason Ren<sup>a,b\*</sup>

<sup>a</sup>Department of Civil and Environmental Engineering and The Andlinger Center for Energy and the Environment, Princeton University, Princeton, NJ 08544 USA

<sup>b</sup>Department of Civil, Environmental, and Architectural Engineering, University of Colorado Boulder, Boulder, CO 80309 USA

<sup>c</sup>National Bioenergy Center, National Renewable Energy Laboratory, 15013 Denver West Parkway, Golden, USA

\*Corresponding authors:

Chen: [Xiaowen.Chen@nrel.gov](mailto:Xiaowen.Chen@nrel.gov); Ren: [zjren@princeton.edu](mailto:zjren@princeton.edu)

**Table S1.** The gradient of water/acetonitrile in the high-performance liquid chromatography eluent.

| Min  | Water+0.05% formic acid | Acetonitrile+0.05% formic acid |
|------|-------------------------|--------------------------------|
| 0.0  | 99.0%                   | 1.0%                           |
| 35.0 | 50.0%                   | 50.0%                          |
| 42.0 | 25.0%                   | 75.0%                          |
| 43.0 | 99.0%                   | 1.0%                           |
| 50.0 | Method ends             |                                |

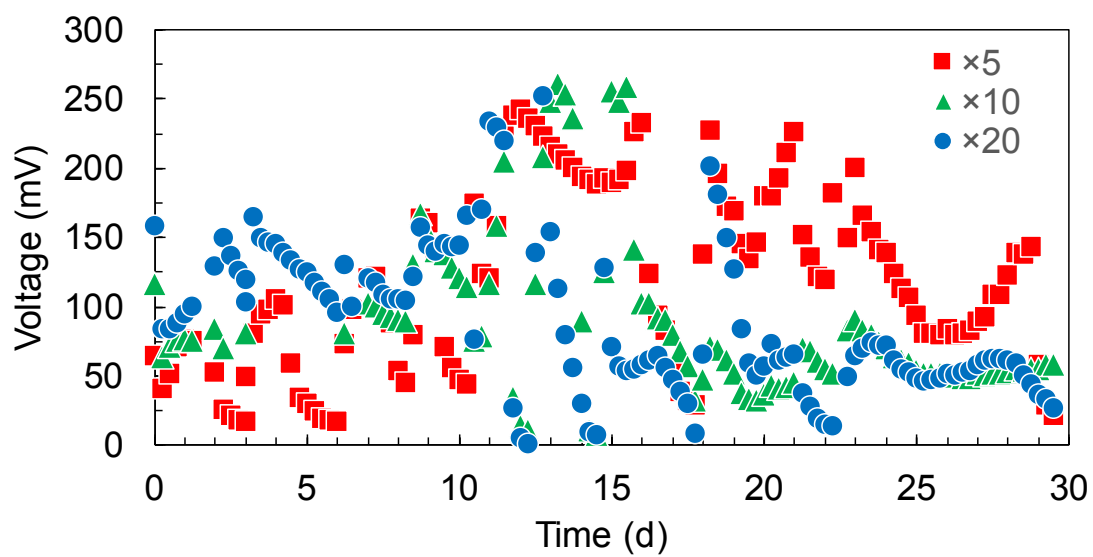

**Figure S1.** Time-course current output of the MBRC when feeding with the concentrated black liquor diluted by 5, 10 and 20 times.

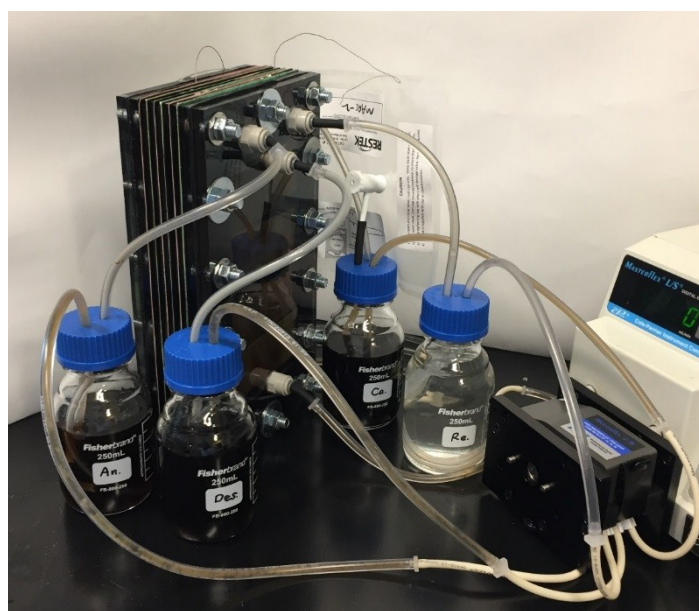

**Figure S2.** Photo of the MBRC reactor. The tubing system showed parallel-loop mode.

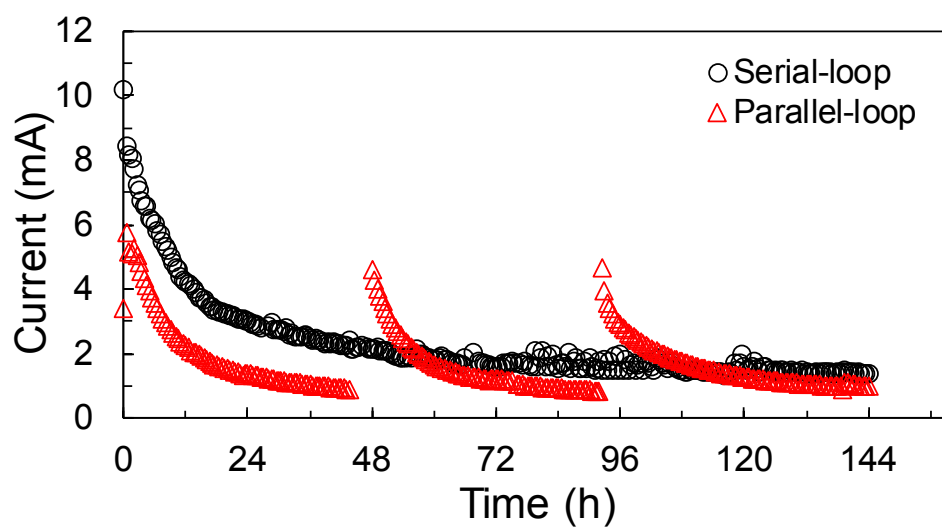

**Figure S3.** The time-course current output of the MBRCs operating in the serial- and parallel-loop mode.

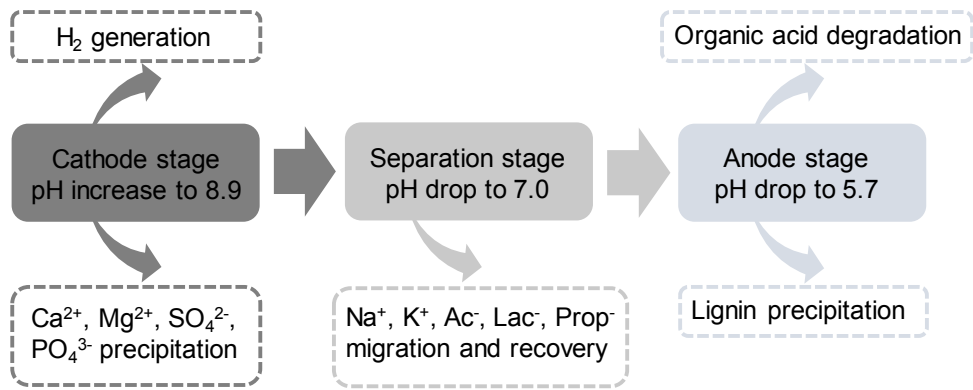

**Figure S4.** The process flow diagram of the parallel-loop mode MBRC operation.
